# Supplementary material
Source: publisher figshare collection journal article supplement (https://sage.figshare.com/ndownloader/files/17484749)
Supplement: Supplementary file 1 [file 17484749]

**Supplementary Table 2.** Summary of clinical details derived from cases with primary vasculitis of the central nervous system.

| Case | Age         | Sex | Breed               | Clinical signs                                                                                                                                      | Laboratory tests                                                                                                                                                                                                                                                              | Imaging findings                                                                               | Pathological description                                                                                                                   | Treatment                                                    | Outcome                                                                      |
|------|-------------|-----|---------------------|-----------------------------------------------------------------------------------------------------------------------------------------------------|-------------------------------------------------------------------------------------------------------------------------------------------------------------------------------------------------------------------------------------------------------------------------------|------------------------------------------------------------------------------------------------|--------------------------------------------------------------------------------------------------------------------------------------------|--------------------------------------------------------------|------------------------------------------------------------------------------|
| 1    | 9 yr        | FS  | Boxer               | Reluctance to walk; pain on standing and walking; vocalization; proprioceptive deficits in multiple limbs; head tilt; ataxia; spinal hyperesthesia. | Hematology and biochemistry unremarkable. <i>Toxoplasma gondii</i> , <i>Neospora caninum</i> , <i>Ehrlichia canis</i> , <i>Leishmania</i> spp., and <i>Babesia canis</i> serology negative. CSF: mixed cell inflammatory pleocytosis. Coagulation times within normal limits. | Thoracic radiographs and abdominal ultrasound unremarkable. MRI suggestive of leptomeningitis. | All parts of brain and spinal cord affected. Circular fibrinoid change with neutrophilic infiltrate in small diameter vessels.             | Prednisolone, clindamycin, infusion of cytosine arabinoside. | Euthanized 9 days after presentation.                                        |
| 2    | 1 yr, 2 mo  | FS  | Miniature Schnauzer | Vomiting; flaccid paralysis; absent spinal reflexes of all 4 limbs.                                                                                 | Hematology and biochemistry unremarkable. Acetylcholine receptor antibody titer negative. <i>Toxoplasma gondii</i> and <i>Neospora caninum</i> serology and CSF PCR negative. CSF: unremarkable.                                                                              | Thoracic radiographs unremarkable.                                                             | Segmental vasculitis of the ventral spinal artery branches with a mononuclear infiltrate.                                                  | None.                                                        | Cardio-respiratory arrest following rhabdomyolysis under general anesthesia. |
| 3    | 10 yr, 4 mo | MI  | Lurcher             | Acute collapse; seizures; obtundation; hemiparesis; head tilt and turn; nystagmus; anisocoria.                                                      | Hematology and biochemistry unremarkable.                                                                                                                                                                                                                                     | Thoracic radiographs unremarkable. Ultrasonography revealed possible cerebellar herniation.    | Brainstem: neutrophilic inflammatory reaction in dorsal midline, with fibrinoid change of vessel walls. Infarcts of the heart and kidneys. | Mannitol infusion.                                           | Euthanized after hospitalized for 2 days.                                    |

|   |             |    |            |                                                                                                                      |                                                                                                                                                                                                                                                                                                    |     |                                                                                                                                                                                      |                                                                                   |                                           |
|---|-------------|----|------------|----------------------------------------------------------------------------------------------------------------------|----------------------------------------------------------------------------------------------------------------------------------------------------------------------------------------------------------------------------------------------------------------------------------------------------|-----|--------------------------------------------------------------------------------------------------------------------------------------------------------------------------------------|-----------------------------------------------------------------------------------|-------------------------------------------|
| 4 | 1 yr, 7 mo  | FI | X          | Pyrexia; ataxia; recumbency; depression; collapse; obtundation; head turn; absent postural reactions in all 4 limbs. | Hematology unremarkable. Serum biochemistry: increased CK activity. CSF: marked mononuclear pleocytosis.                                                                                                                                                                                           | NA. | Fibrinoid change of vessel walls in white matter tracts of the brain and spinal cord. Neutrophilic and mononuclear cell infiltrate.                                                  | Dexamethasone, clindamycin, mannitol and hypertonic saline infusions, furosemide. | Died within 24 hr of hospitalization.     |
| 5 | 2 yr, 10 mo | FS | Weimaraner | Pelvic limb ataxia and paraparesis. Lumbar spinal hyperesthesia.                                                     | Hematology and biochemistry unremarkable. CSF: mixed pleocytosis (predominantly neutrophilic and macrophagic). Synovial fluid: neutrophilic arthritis of 2 joints. PCR for <i>Toxoplasma gondii</i> , <i>Neospora caninum</i> , <i>Borrelia burgdorferi</i> , and <i>Ehrlichia canis</i> negative. | NA. | Fibrinoid change of leptomeningeal blood vessels. Infiltration of the choroid plexus stroma and leptomeninges of brain and spinal cord by lymphocytes, macrophages, and neutrophils. | Cytosine arabinoside infusion, dexamethasone.                                     | Euthanized after hospitalized for 3 days. |
| 6 | 8 mo        | MI | Weimaraner | Cervical pain and right thoracic limb lameness following trauma. Lethargy; depression; stiffness.                    | Hematology: neutrophilia. Biochemistry unremarkable. Coagulation times normal. CSF unremarkable.                                                                                                                                                                                                   | NA. | Severe necrotizing vasculitis with fibrinoid change of the walls of 2 medium to small arteries in the ventral cervical spinal cord, and throughout meninges.                         | Carprofen, morphine, diazepam.                                                    | Euthanized after hospitalized for 3 days. |

\* FS = female, spayed; FI = female, intact; MI = male, intact; CSF = cerebrospinal fluid; MRI = magnetic resonance imaging; PCR = polymerase chain reaction; NA = not applicable.
